# Supplementary material
Source: Research Square preprint supplement (doi:10.21203/rs.3.rs-10214129/v1)
Supplement: Supplementary file 1 [file 675720437342112279c6e355.docx]

**Supplementary information**

**Room-temperature gas mixture identification with a single magnetic-field-assisted metal oxide sensor**

Yu Chen1, Haifeng Sun1, Lulu Du1 Kaifeng Xue2,*, Pinhua Zhang1,*, Lijuan Xue1,*, Guangliang Cui1,*

1 School of Physics and Electrical Engineering, Linyi University, Linyi, 276000, China.

2 School of Mechanical and Vehicle Engineering, Linyi University, Linyi, 276000, China.

*Corresponding authors: xuekaifeng@lyu.edu.cn; zhangpinhua@lyu.edu.cn; xuelijuan@lyu.edu.cn; cuiguangliang@lyu.edu.cn;

Keywords: ZnO, Co3O4, Gas Sensor, Gas identification, Magnetic field, Heterostructure





**Figure S1**. XPS survey spectra of the ZnO/Co3O4 heterostructure before and after exposure to H2S and SO2 gases.

**Fig. S1** shows the XPS survey spectra of the ZnO/Co3O4 heterostructure before and after exposure to H2S and SO2. No discernible S 2p signal was detected for the pristine sample, whereas a distinct S 2p signal emerged after exposure to either H2S or SO2, indicating the incorporation and retention of sulfur-containing species on the surface. These results suggest gas-surface interactions, likely involving chemisorption and surface sulfidation or oxidation processes.


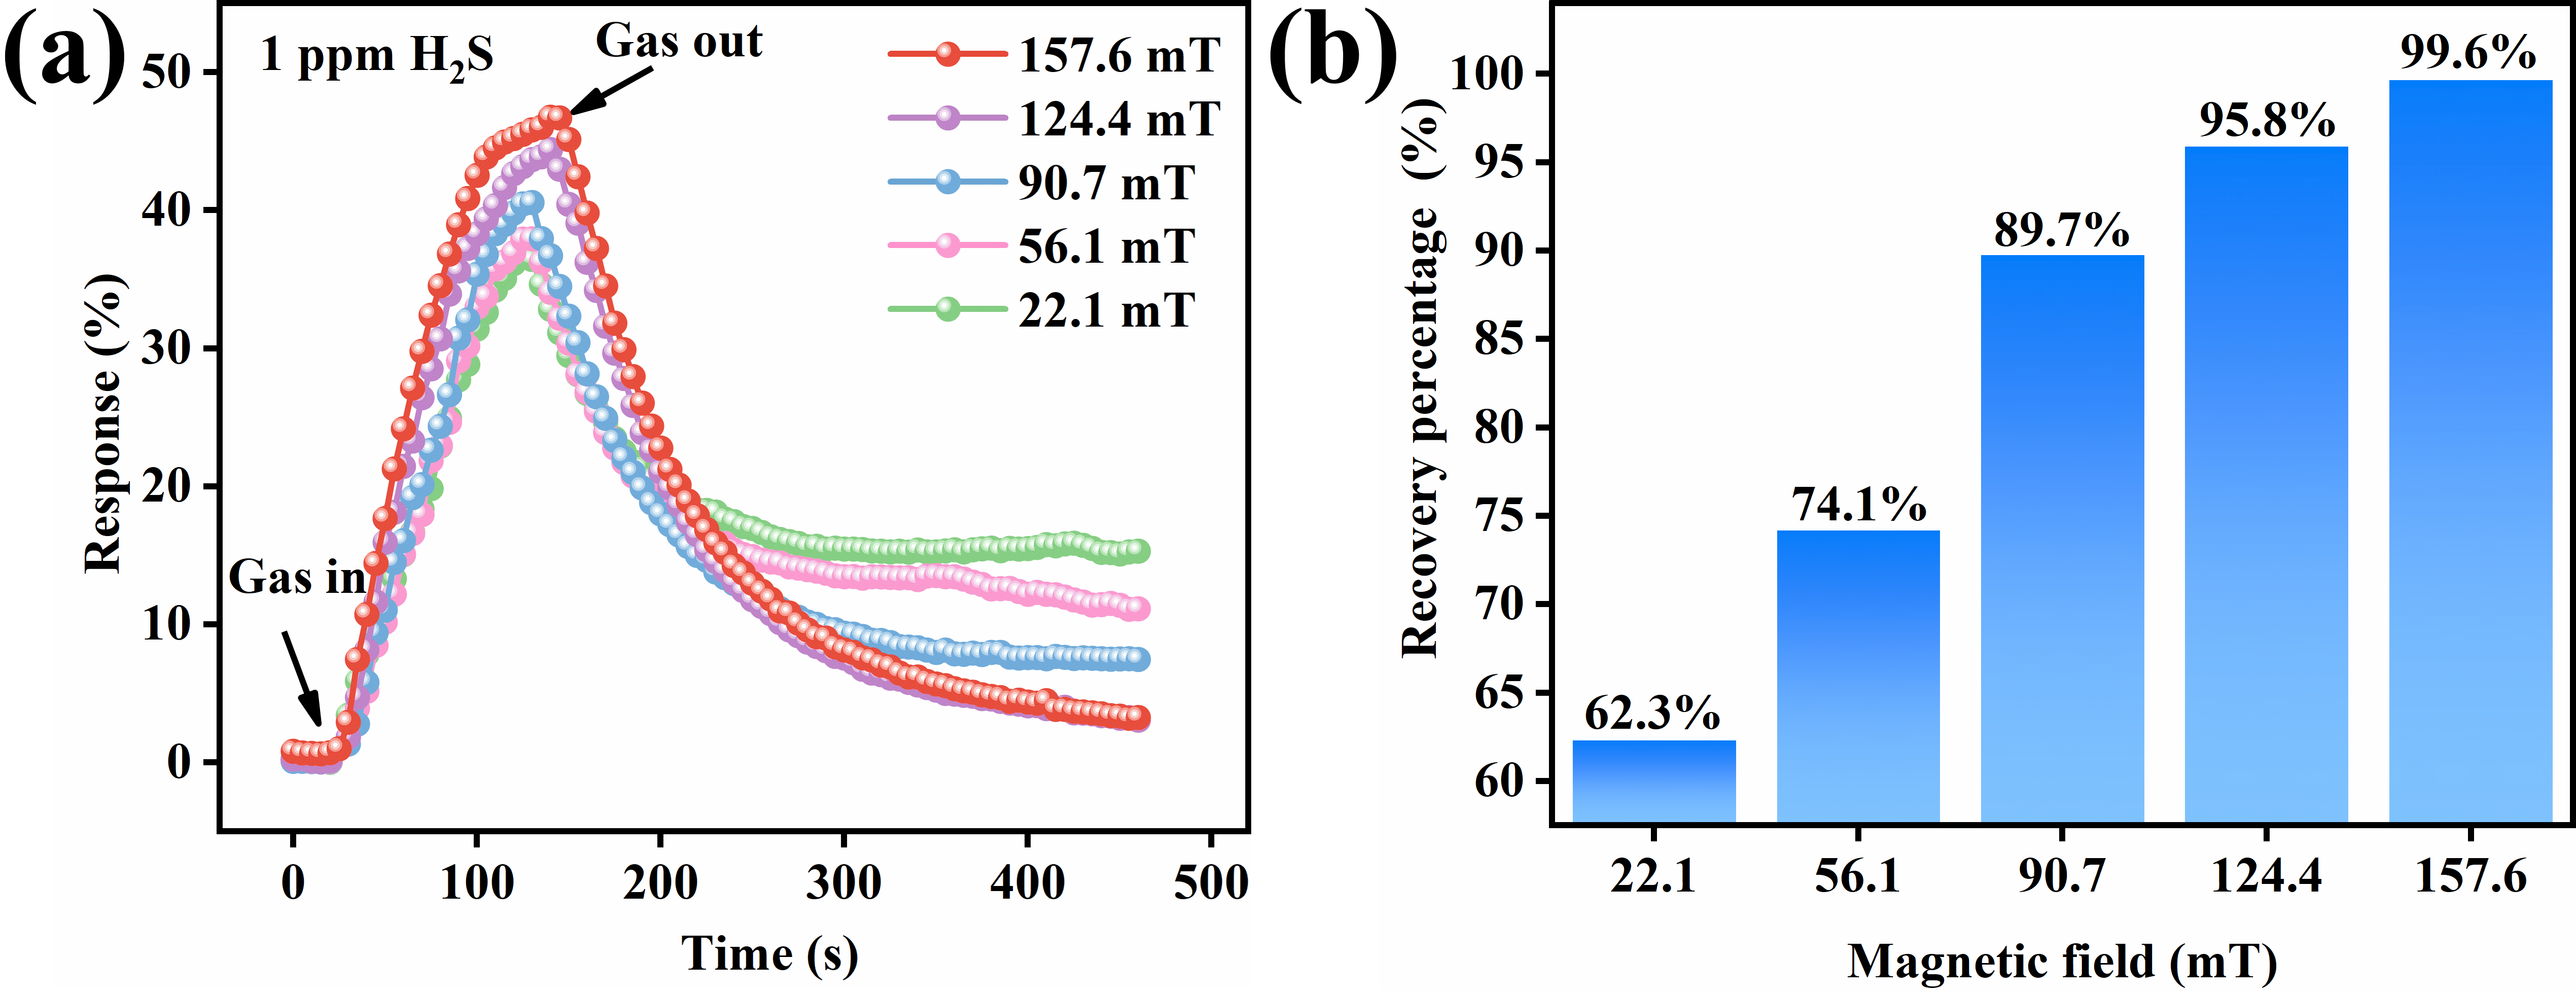


**Figure S2**. H2S sensing performance of the ZnO/Co3O4 heterostructure sensor under magnetic field regulation. (a) Dynamic response curves of the sensor toward 1 ppm H2S under different magnetic field intensities; (b) corresponding recovery percentage after H2S purging.

**Fig. S2**a summarizes the response behavior of the ZnO/Co3O4 heterostructure sensor toward 1 ppm H2S under different magnetic field intensities. As the magnetic field intensity increased from 22.1 to 157.6 mT, the recovery performance of the sensor was significantly improved. Specifically, the recovery percentage increased from 62.3% at 22.1 mT to 89.7% at 90.7 mT, and further increased to 99.6% at 157.6 mT (as shown in **Fig. S2**b), indicating that a stronger magnetic field is more favorable for promoting sensor recovery. As shown in **Fig. S2**b, nearly complete recovery is achieved at 157.6 mT. Hence, this magnetic field strength was adopted as the standard for all subsequent experiments.





**Figure S3**. Dynamic response curves of the sensor toward different H2S concentrations with and without an applied magnetic field.

**Fig. S3** compares the dynamic gas-sensing responses of the sensor to various H2S concentrations (1–100 ppm) with and without a 157.6 mT magnetic field, further confirming the role of the magnetic field in facilitating sensor recovery. In the absence of a magnetic field, the sensor exhibited only minimal recovery after H2S removal, whereas nearly complete recovery was achieved under the applied magnetic field.


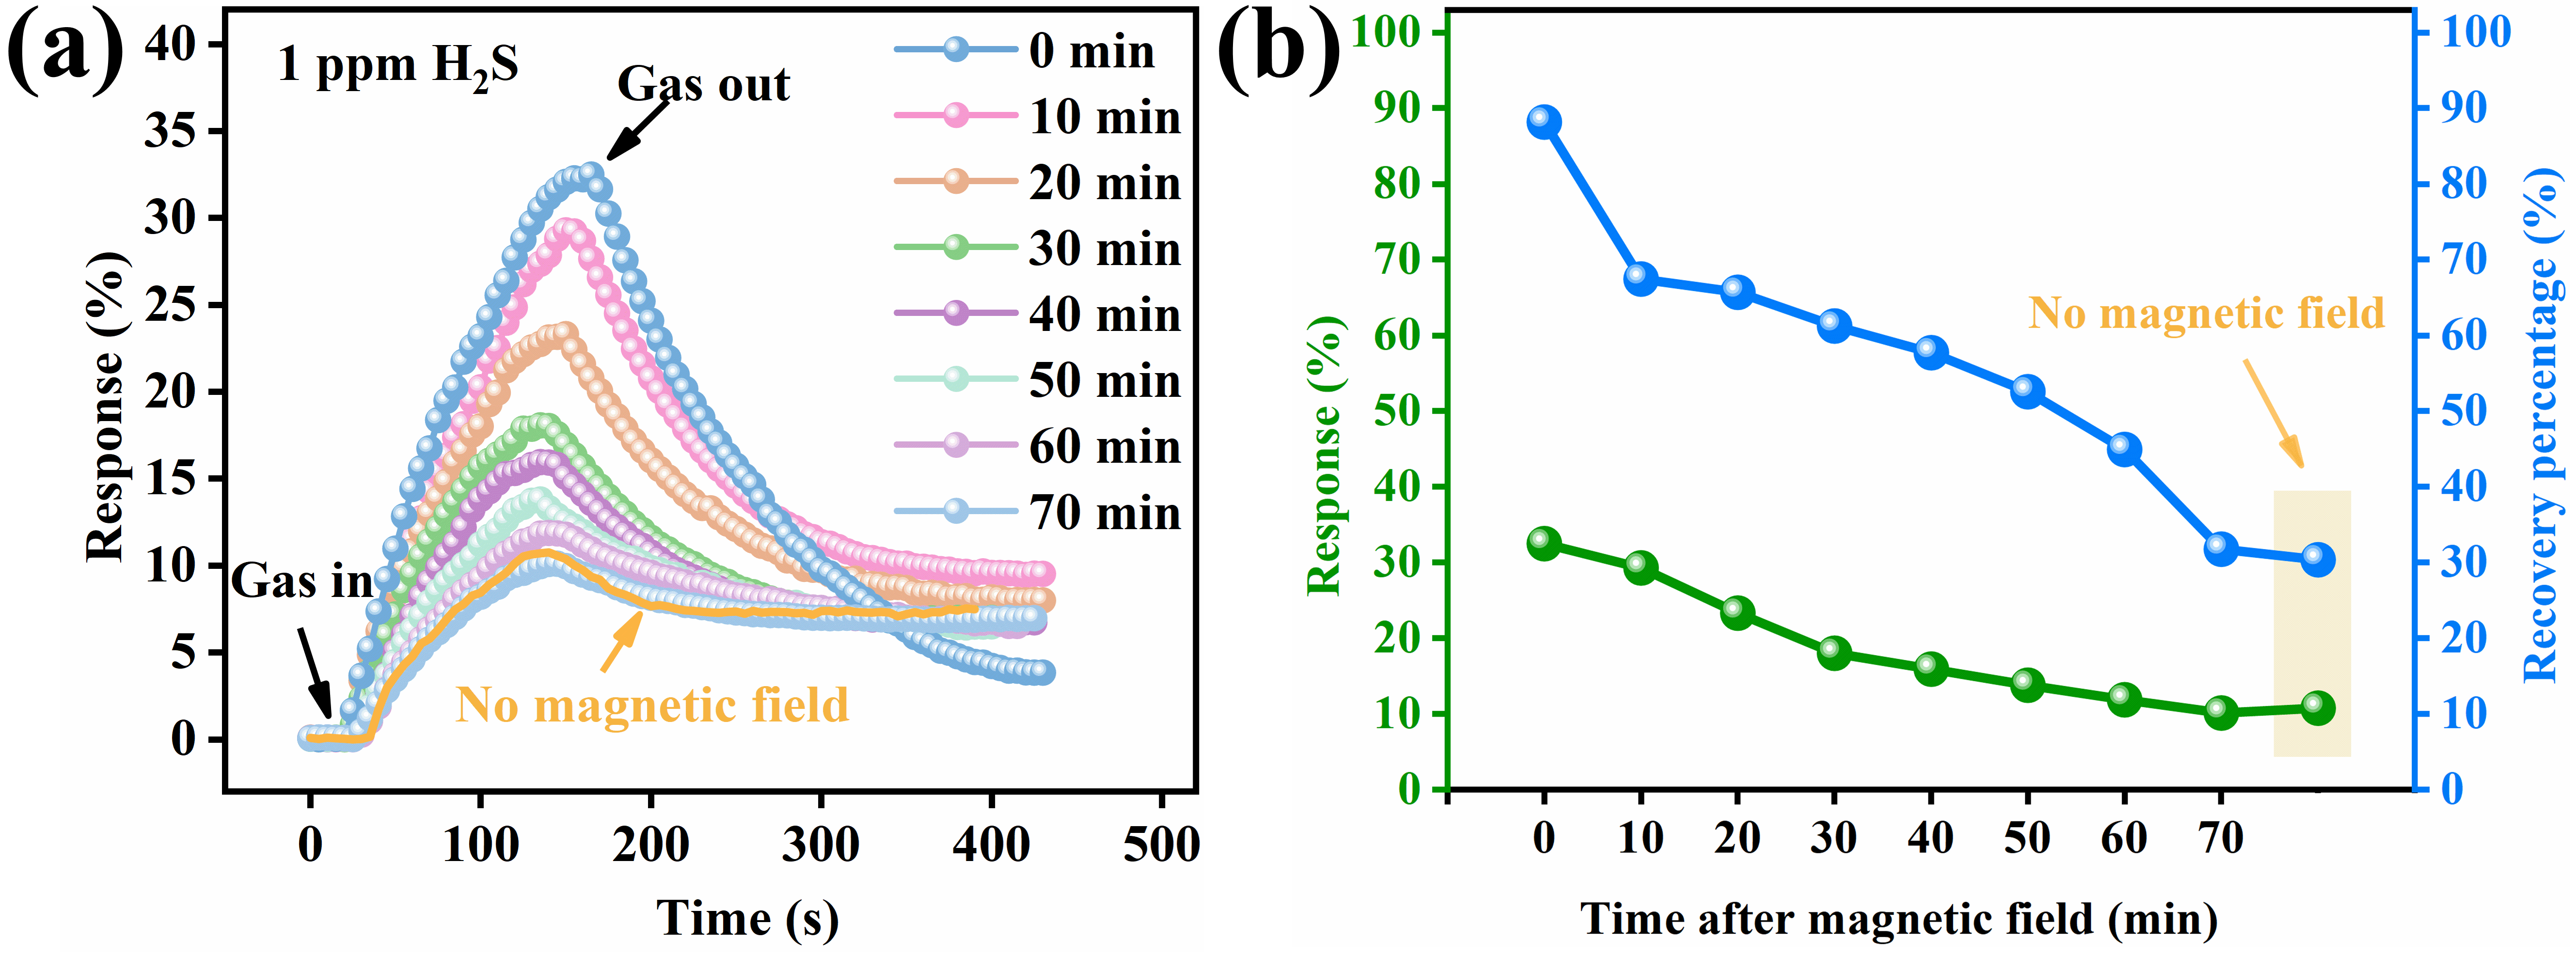


**Figure S4**. (a) Dynamic response curves of the sensor toward 1 ppm H2S at different storage times after magnetization under a 157.6 mT magnetic field for 2 h; (b) corresponding response values and recovery percentage.

**Fig. S**4a presents the dynamic response behavior of the sensor after pretreatment under a 157.6 mT magnetic field for 2 h. After removal of the magnetic field, the sensor still exhibited enhanced recovery behavior toward 1 ppm H2S, with the resistance recovering to approximately 88% of its initial value. However, with increasing storage time after magnetic field removal, both the response value and recovery percentage gradually decreased. After 70 min, the sensing behavior became nearly identical to that observed in the absence of a magnetic field, indicating that the magnetic-field-induced enhancement had largely diminished. **Fig. S**4b further quantifies this trend, showing that both the response value and recovery percentage decreased monotonically within 70 min. This behavior suggests that the ZnO/Co3O4 heterostructure was temporarily magnetized as its magnetic moments became aligned under the external magnetic field; once the field was removed, the moments gradually returned to a disordered state, accompanied by recovery of the gas-sensing properties to their initial non-magnetized state.


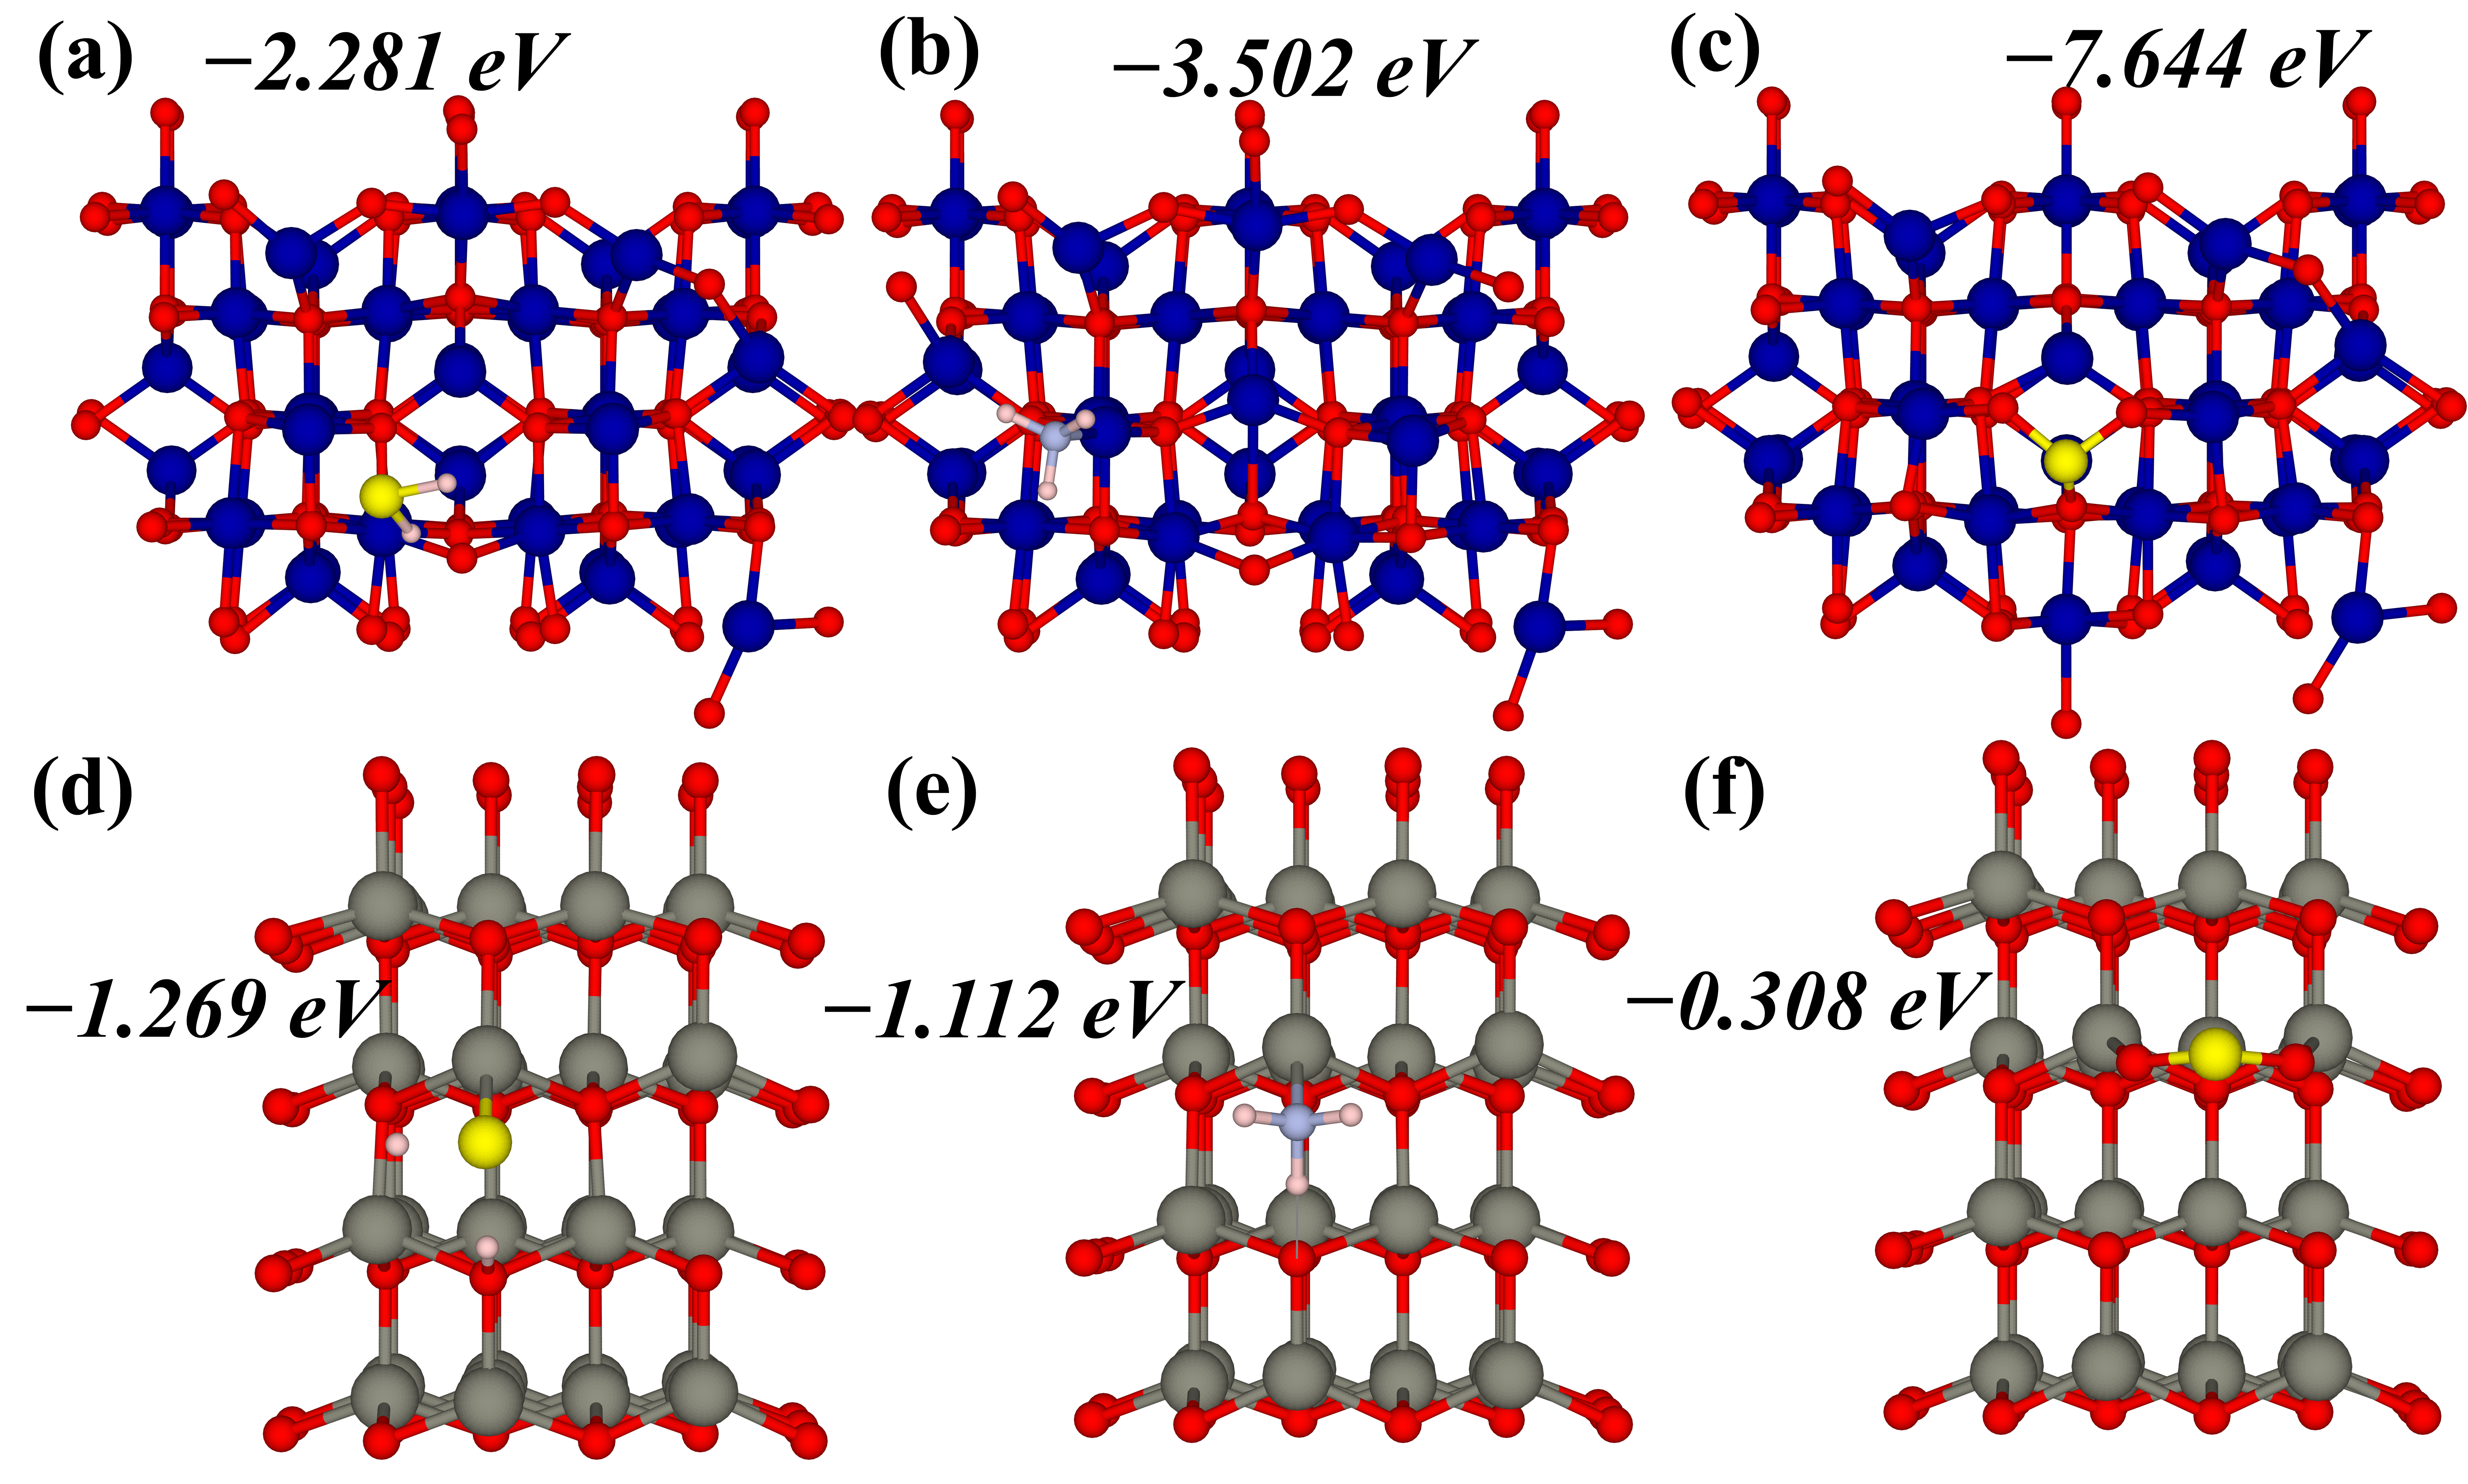


**Figure S**5. (a-c) Optimized adsorption states and adsorption energies of H2S, NH3, and SO2 molecules on Co₃O₄ surfaces. (d-e) Optimized adsorption states and adsorption energies of H2S, NH3, and SO2 molecules on ZnO surfaces.

The adsorption-energy results further confirm the dominant role of Co3O4-related sites in the surface adsorption process of the ZnO/Co3O4 heterostructure. As shown in **Fig. S**5 a-f, the adsorption energy of H2S on Co3O4 is −2.281 eV, which is much more negative than that on ZnO, −1.269 eV, with a difference of about 1.01 eV. This indicates that H2S molecules are thermodynamically more favorable to adsorb on the Co3O4-related surface or interface sites than on ZnO. Notably, a similar tendency is also observed for SO2 and NH3: the adsorption energies of SO2 and NH3 on Co3O4 are −7.644 and −3.502 eV, respectively, which are significantly more negative than those on ZnO, −0.308 and −1.112 eV. These results suggest that, within the ZnO/Co3O4 heterostructure, Co3O4 provides the main adsorption and reaction sites for gas molecules, while ZnO mainly participates in constructing the p–n heterointerface and regulating charge transport. However, the limited H2S response of pristine Co3O4 indicates that strong adsorption alone is insufficient to produce superior sensing performance. Therefore, Co3O4 mainly promotes H2S adsorption and surface reaction, whereas the ZnO/Co3O4 p–n junction converts the local adsorption-induced charge variation into pronounced resistance modulation.

From the perspective of barrier modulation, the enhanced H2S sensing performance of the ZnO/Co3O4 heterostructure arises from the synergistic effect of Co3O4-dominated surface reactions and ZnO/Co3O4 interfacial barrier regulation. Pure ZnO and pure Co3O4 show limited H2S responses under identical conditions, indicating that the p–n heterointerface is crucial for signal amplification. When n-type ZnO contacts p-type Co3O4, carrier diffusion occurs until Fermi-level equilibrium is reached, resulting in band bending1and an additional interfacial potential barrier2. This barrier makes charge transport highly sensitive to gas-induced surface charge changes. In air, adsorbed oxygen captures electrons and forms reactive oxygen species such as O2−. For p-type Co3O4, this increases hole concentration and strengthens the hole-accumulation layer, promoting hole transport3. Upon H2S exposure, H2S preferentially reacts with adsorbed oxygen species on the Co3O4-rich surface and interfacial regions, releasing electrons that recombine with holes, thereby reducing hole concentration and weakening hole transport. Conversely, on the ZnO surface, the electron concentration increases and electron transport is enhanced.

Meanwhile, XPS results after H2S exposure reveal sulfide-related surface/interface species4–7. The formation of sulfide layers induces significant changes in the band structure and creates multiple new p–p and p–n heterointerfaces, such as CoS/Co3O4, ZnS/ZnO, and CoS/ZnS. The energy-level mismatch at these newly formed interfaces leads to the generation of localized potential barriers8. These barriers hinder charge transfer across the heterointerfaces, resulting in a pronounced increase in resistance2. Similarly, the gas-sensing processes for SO2 and NH3 are analogous to that of H2S: their response is based on reactions with surface-adsorbed oxygen species, generating an increase in resistance. In contrast, the sensing mechanism for NO2 relies on competitive adsorption with adsorbed oxygen; NO2 captures more electrons from the material surface, thereby producing a decreased resistance gas response signal.

**Computational Details**

Spin-polarized density functional theory calculations were performed using the Vienna Ab initio Simulation Package (VASP, version 5.4.1).9,10 The projector augmented-wave method11,12 and the Perdew–Burke–Ernzerhof exchange-correlation functional within the generalized gradient approximation were employed.13 The localized Co 3d electrons were treated using the Dudarev DFT+U approach, with an effective Hubbard parameter of Ueff = U − J = 3.3 eV.14 A plane-wave cutoff energy of 520 eV was used throughout the calculations. Bulk Co3O4 was optimized in both ferromagnetic and antiferromagnetic configurations using a Γ-centered 5 × 5 × 5 k-point mesh. Both the lattice parameters and atomic positions were fully relaxed until the total-energy difference and the residual force on each atom were below 1.0 × 10-6 eV and 0.02 eV Å-1, respectively. The Co3O4(100) slab was constructed from the optimized bulk structure and contained 46 Co and 64 O atoms. A vacuum region of 15 Å was introduced along the surface-normal direction to avoid interactions between periodically repeated slabs. The clean and adsorbate-covered surfaces were sampled using a Γ-centered 2 × 2 × 1 k-point mesh. The atoms in the bottom region of the slab were fixed at their bulk positions, whereas the remaining surface atoms and the adsorbates were fully relaxed with the lattice parameters held constant. The electronic-energy and force convergence criteria were set to 1.0 × 10-5 eV and 0.03 eV Å-1, respectively. Gaussian smearing with a width of 0.05 eV was employed. Crystal symmetry was disabled to preserve the imposed magnetic arrangements and adsorption geometries, and a dipole correction was applied along the surface-normal direction.

The adsorption of H2S, NH3, and SO2 was investigated on both AFM-like and FM-like Co3O4(100) surfaces. For each AFM-like adsorption system, the initial spin arrangement was kept consistent with that of the corresponding clean AFM-like surface. The isolated gas molecules were separately optimized in 15 × 15 × 15 Å3 cubic cells using Γ-point sampling. The adsorption energy was calculated as Eads = Eslab+gas − Eslab − Egas, where Eslab+gas, Eslab, and Egas are the total energies of the gas-adsorbed surface, the corresponding clean Co3O4(100) surface with the same magnetic configuration, and the isolated gas molecule, respectively. A more negative Eads value indicates stronger stabilization of the adsorbed molecule.

To evaluate the thermodynamic tendency toward the formation of a surface sulfur residue from gas-phase H₂S, the overall sulfidation reaction energy was defined as ΔEsulf = Eslab+S + EH₂ − Eslab − EH₂S, where Eslab+S is the total energy of the independently optimized surface sulfur-residue structure, and EH₂ and EH₂S are the total energies of isolated H2 and H2S molecules, respectively. A more negative ΔEsulf value indicates a greater overall thermodynamic driving force for the formation of the sulfur-residue endpoint from the clean surface and gas-phase H2S. To directly compare the relative stability of molecularly adsorbed H2S and the sulfur-residue endpoint, the relative endpoint conversion energy was defined as ΔEconv = Eslab+S + EH₂ − Eslab+H₂S, where Eslab+H₂S is the total energy of the optimized molecular H2S adsorption structure. This quantity is related to the adsorption and overall sulfidation energies through ΔEconv = ΔEsulf − Eads. A negative ΔEconv value indicates that the sulfur-residue endpoint is thermodynamically more stable than molecularly adsorbed H2S, whereas a positive value indicates preferential stabilization of the molecular adsorption state. ΔEconv represents an endpoint thermodynamic energy difference and should not be interpreted as an activation barrier for H2S dehydrogenation.

**Reference**

1. Blackman, C. Do We Need “Ionosorbed” Oxygen Species? (Or, “A Surface Conductivity Model of Gas Sensitivity in Metal Oxides Based on Variable Surface Oxygen Vacancy Concentration”). *ACS Sens.* 6, 3509–3516 (2021).

2. Dutta, T. *et al.* Road Map of Semiconductor Metal-Oxide-Based Sensors: A Review. *Sensors* 23, 6849 (2023).

3. Gao, X. *et al.* An overview: Facet-dependent metal oxide semiconductor gas sensors. *Sensors and Actuators B: Chemical* 277, 604–633 (2018).

4. Luo, N. *et al.*Pt‐functionalized Amorphous RuOx as Excellent Stability and High‐activity Catalysts for Low Temperature MEMS Sensors. *Small* 19, 2300006 (2023).

5. Raza, A. *et al.* Synergistic ZnS@Co3O4/MXene hybrid derived from ZIF-67 for high-performance supercapacitors. *Journal of Energy Storage* 151, 120420 (2026).

6. Li, Q. *et al.* Optimized Co–S bonds energy and confinement effect of hollow MXene@CoS2/NC for enhanced sodium storage kinetics and stability. *Chemical Engineering Journal* 450, 137922 (2022).

7. Xiao, F. *et al.* MOF-Derived CoS2/N-Doped Carbon Composite to Induce Short-Chain Sulfur Molecule Generation for Enhanced Sodium–Sulfur Battery Performance. *ACS Appl. Mater. Interfaces* 13, 18010–18020 (2021).

8. Song, X. *et al.* Rapid and high responsive Pt-Co3O4@SnO2 core-shell nanofibers for room-temperature detection of H2S in exhaled breath for non-invasive asthma diagnosis. *Chemical Engineering Journal* 533, 174765 (2026).

9. Kresse, G. *et al.* Efficient iterative schemes for *ab initio* total-energy calculations using a plane-wave basis set. *Phys. Rev. B* 54, 11169–11186 (1996).

10. Kresse, G. *et al.* Efficiency of ab-initio total energy calculations for metals and semiconductors using a plane-wave basis set. *Computational Materials Science* 6, 15–50 (1996).

11. Kresse, G. *et al.* From ultrasoft pseudopotentials to the projector augmented-wave method. *Phys. Rev. B* 59, 1758–1775 (1999).

12. Blöchl, P. E. Projector augmented-wave method. *Phys. Rev. B* 50, 17953–17979 (1994).

13. Perdew, J. P. *et al.* Generalized Gradient Approximation Made Simple [Phys. Rev. Lett. 77, 3865 (1996)]. *Phys. Rev. Lett.* 78, 1396–1396 (1997).

14. Dudarev, S. L. *et al.* Electron-energy-loss spectra and the structural stability of nickel oxide: An LSDA+U study. *Phys. Rev. B* 57, 1505–1509 (1998).
